# Supplementary material for: Composition-tunable nonlinear optical properties of ternary CdSexS1−x (x = 0–1) alloy quantum dots
Source: Royal Society of Chemistry journal article supplement (doi:10.1039/c4nj00823e), 2014-01-01
Supplement: c4nj00823e1.pdf [file c4nj00823e1.pdf]

## Electronic Supplementary Information

### Composition-Tunable Nonlinear Optical Properties of Alloy Ternary

### $\text{CdSe}_x\text{S}_{1-x}$ ( $x = 0-1$ ) Quantum Dots

**Dabin Yu,\* Kai Du, Jinhua Zhang, Feng Wang, Leilei Chen, Minghui Zhao, Jingtian Bian, Yueyue Feng,  
and Yang Jiao**

State Key Laboratory of Pulsed Power Laser Technology, Electronic Engineering

Institute, 460 Huangshan Road, Hefei, Anhui 230037, People's Republic of China

\*Corresponding author, E-mail: [dbyu@ustc.edu](mailto:dbyu@ustc.edu)

*To be published in New Journal of Chemistry*

## 1. The Z-scan experimental results obtained with an open aperture

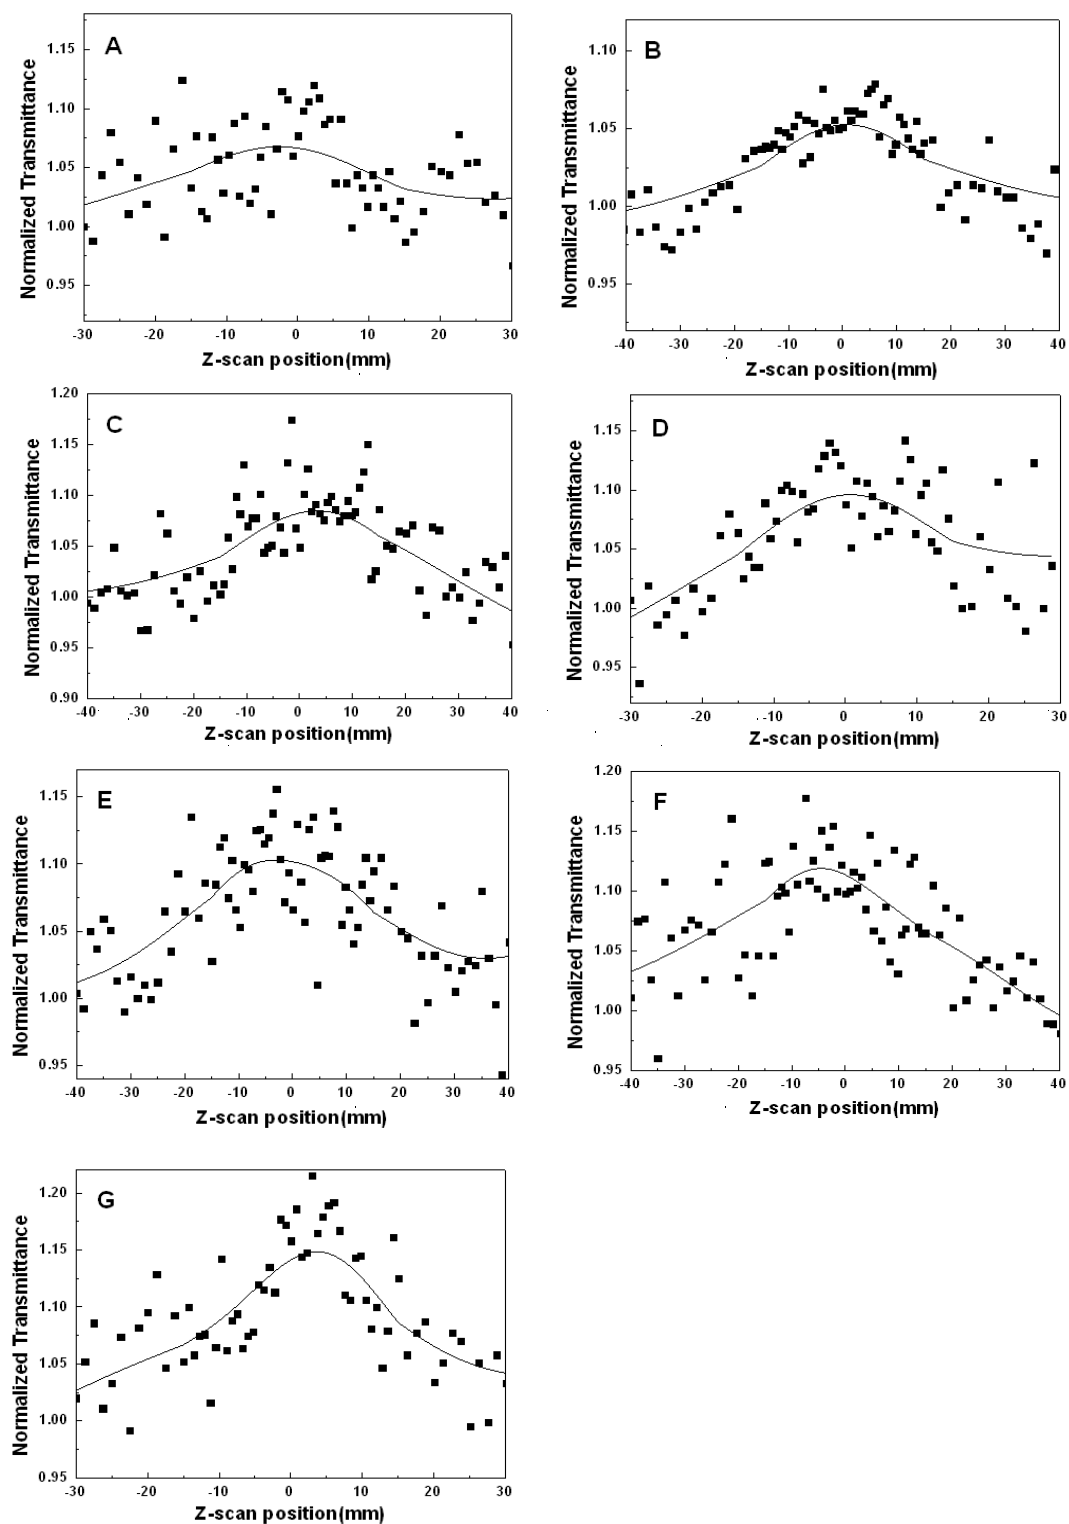

Fig. ES11 The open-aperture Z-scan curves of the  $\text{CdSe}_x\text{S}_{1-x}$  QDs with different compositions: (A) CdS, (B)

$\text{CdSe}_{0.14}\text{S}_{0.86}$ , (C)  $\text{CdSe}_{0.33}\text{S}_{0.67}$ , (D)  $\text{CdSe}_{0.43}\text{S}_{0.57}$ , (E)  $\text{CdSe}_{0.56}\text{S}_{0.44}$ , (F)  $\text{CdSe}_{0.76}\text{S}_{0.24}$  and (G) CdSe.

## 2. The Z-scan experimental results obtained with a closed aperture

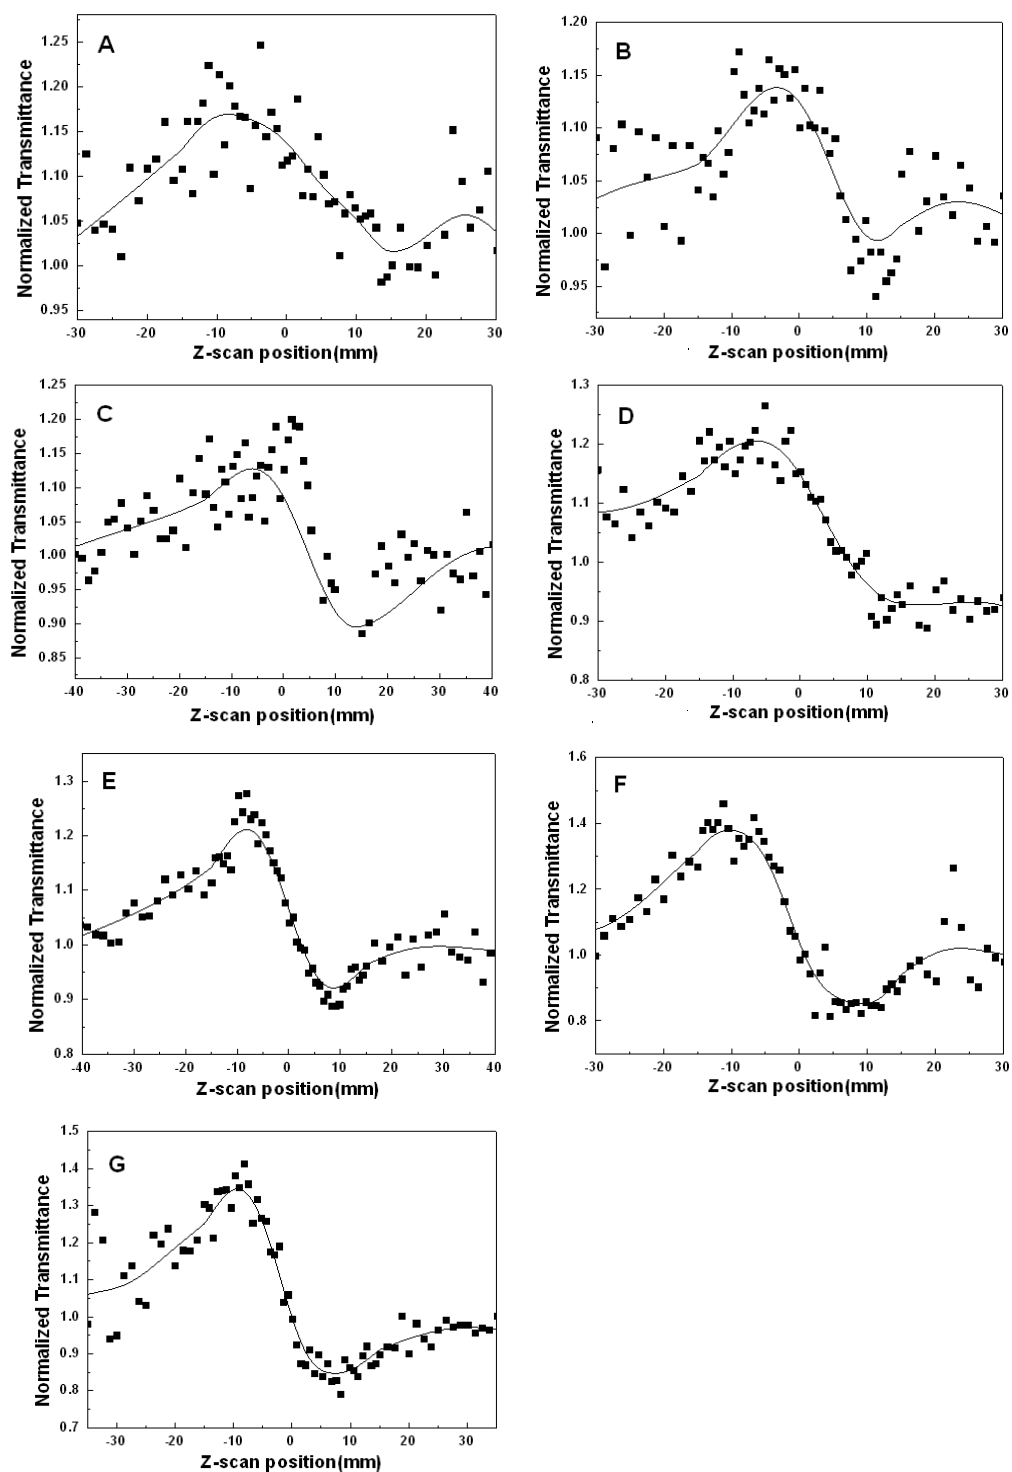

**Fig. ESI2** The closed-aperture ( $S=0.054$ ) Z-scan curves of the  $\text{CdSe}_x\text{S}_{1-x}$  QDs with different compositions:

(A) CdS, (B)  $\text{CdSe}_{0.14}\text{S}_{0.86}$ , (C)  $\text{CdSe}_{0.33}\text{S}_{0.67}$ , (D)  $\text{CdSe}_{0.43}\text{S}_{0.57}$ , (E)  $\text{CdSe}_{0.56}\text{S}_{0.44}$ , (F)  $\text{CdSe}_{0.76}\text{S}_{0.24}$  and (G)

CdSe.

### 3. Calculation of the nonlinearity of CdSe<sub>x</sub>S<sub>1-x</sub> QDs

The purely nonlinear refraction Z-scan data are obtained by dividing the closed-aperture data with the corresponding open aperture data.  $\Delta\Phi_0$  can be obtained from the purely nonlinear refraction Z-scan data by fitting the open aperture data using Eq. (1) :

$$T=1+\frac{4x}{(x^2+9)(x^2+1)}\Delta\Phi_0 \quad (1)$$

where T is the normalized transmittance of the sample with,  $\Delta\Phi_0$  is the phase shift at the focus,  $x=z/z_0$ ,  $z_0 = \frac{pw_0^2}{l}$  is the laser diffraction length.

The nonlinear refractive index  $g$  of the CdSe<sub>x</sub>S<sub>1-x</sub> QDs is determined according to Eq. (2) and (3):

$$|\Delta\Phi_0| = (2p/l)gI_0L_{eff} \quad (2)$$

$$n_2(esu) = (cn_0/40p)g(m^2/W) \quad (3)$$

where  $I_0$  is on-axis pulse peak intensity on sample in the form of  $I_0 = E/pw_0^2t$  where E is the pulse energy,  $w_0$  is the radius of the beam waist,  $t$  is the pulse width,  $l$  is the laser wavelength,  $L_{eff}$  is the effective length of the sample, which is related to the sample thickness L and the linear absorption coefficient  $\alpha$ , in the form of  $L_{eff} = [1 - \exp(-\alpha L)]/\alpha$ , c is the speed of light, and  $n_0$  is the linear index of refraction of the quantum dots.

The nonlinear absorption,  $\beta$  of the CdSe<sub>x</sub>S<sub>1-x</sub> quantum dots can be obtained from Z-scan data by fitting the open aperture data using Eq.(4):

$$T(z,S=1) = \sum_{m=0}^{\infty} \frac{[-q_0(z,0)]^m}{(m+1)^{3/2}} \quad (4)$$

Where  $q_0 = bI_0L_{eff}/(1+z^2/z_0^2)$ ,  $z_0 = pw_0^2/l$  is the laser diffraction length.

The nonlinear susceptibility is a result of interaction between light wave field and medium. It can be evaluated through measuring  $n_2$  or  $\gamma$ . To the sample having the nonlinear absorption, the nonlinear susceptibility is considered to be a complex number. For CdSe<sub>x</sub>S<sub>1-x</sub> quantum dots, the value of third-order nonlinear susceptibility  $c^{(3)}$  is calculated by Eq.(5):

$$c^{(3)} = c_R^{(3)} + ic_I^{(3)} \quad (5)$$

The real and imaginary parts of the third-order nonlinear susceptibility were deduced by using the values  $\gamma$  and  $\beta$ , as shown in Eqs.(6), (7) and (8).

$$\text{Re}c^{(3)} = 2n_0^2 e_0 c g \quad (6)$$

$$\text{Im} c^{(3)} = n_0^2 e_0 c l b / 2p \quad (7)$$

$$c^{(3)} = \left\{ \left( \text{Re}c^{(3)} \right)^2 + \left( \text{Im} c^{(3)} \right)^2 \right\}^{\frac{1}{2}} \quad (8)$$

Where  $n_0$  is the linear refractive index of the quantum dots,  $e_0$  is the permittivity of free space.

#### 4. Nonlinearity of CdSe<sub>0.43</sub>S<sub>0.57</sub> with different sizes

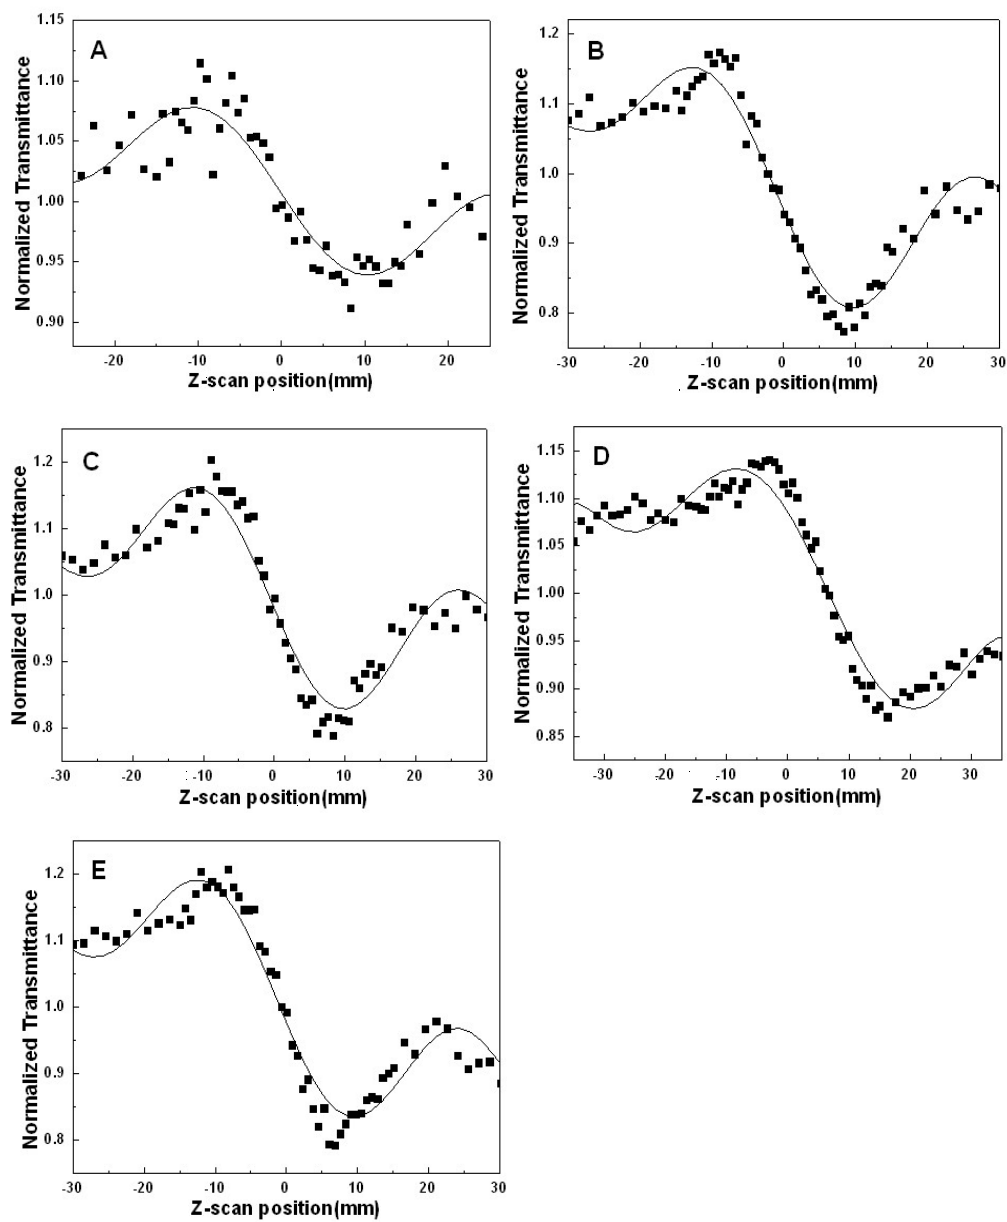

**Fig. ESI3** Z-scan curves of CdSe<sub>0.43</sub>S<sub>0.57</sub> with different sizes: (A) 2.0 nm, (B) 2.3 nm, (C) 2.6 nm, (D) 2.9 nm, (E) 3.1 nm.

**Table. ESI1** Calculated values of the nonlinearity of CdSe<sub>0.43</sub>S<sub>0.57</sub> with different sizes.

| Average size (nm) | CdSe <sub>0.43</sub> S <sub>0.57</sub> | $\beta$ (m/W)           | $n_2$ (esu)             | $\text{Im}(\chi^{(3)})^a$ | $\text{Re}(\chi^{(3)})^b$ | $\chi^{(3)}$ (esu)     |
|-------------------|----------------------------------------|-------------------------|-------------------------|---------------------------|---------------------------|------------------------|
| 2.0               | 170°C                                  | $-3.35 \times 10^{-11}$ | $-5.15 \times 10^{-11}$ | $-1.69 \times 10^{-19}$   | $-1.76 \times 10^{-19}$   | $2.44 \times 10^{-19}$ |
| 2.3               | 190°C                                  | $-3.60 \times 10^{-11}$ | $-5.38 \times 10^{-11}$ | $-1.82 \times 10^{-19}$   | $-1.84 \times 10^{-19}$   | $2.59 \times 10^{-19}$ |
| 2.6               | 210°C                                  | $-3.52 \times 10^{-11}$ | $-5.28 \times 10^{-11}$ | $-1.78 \times 10^{-19}$   | $-1.80 \times 10^{-19}$   | $2.52 \times 10^{-19}$ |
| 2.9               | 230°C                                  | $-3.47 \times 10^{-11}$ | $-5.35 \times 10^{-11}$ | $-1.76 \times 10^{-19}$   | $-1.83 \times 10^{-19}$   | $2.54 \times 10^{-19}$ |
| 3.1               | 250°C                                  | $-3.63 \times 10^{-11}$ | $-5.45 \times 10^{-11}$ | $-1.83 \times 10^{-19}$   | $-1.86 \times 10^{-19}$   | $2.61 \times 10^{-19}$ |
